# Supplementary material for: Fluorinated polyhedral oligomeric silsesquioxanes
Source: Royal Society of Chemistry journal article supplement (doi:10.1039/c4ra15108a), 2014-12-09
Supplement: c4ra15108a1.pdf [file c4ra15108a1.pdf]

**Electronic Supporting Information for**  
**Fluorinated Polyhedral Oligomeric Silsesquioxane**

Xiaobai Wang,<sup>†</sup> Qun Ye,<sup>†</sup> Jing Song,<sup>†</sup> Ching Mui Cho,<sup>†</sup> Chaobin He,<sup>†,‡</sup> Jianwei Xu<sup>†,\*</sup>

<sup>†</sup> Institute of Materials Research and Engineering, A\*STAR (Agency for Science, Technology and Research), 3 Research Link, Republic of Singapore 117602

<sup>‡</sup> Department of Materials Science & Engineering, National University of Singapore, 5 Engineering Drive 2, Republic of Singapore 117576

[jw-xu@imre.a-star.edu.sg](mailto:jw-xu@imre.a-star.edu.sg)

### 1. Instrumentation

<sup>1</sup>H, <sup>13</sup>C NMR, <sup>29</sup>Si nuclear magnetic resonance (NMR) spectra were recorded on a Bruker DRX 400 MHz spectrometer in CDCl<sub>3</sub> at room temperature. Spectrometer operating frequencies were 400.13 MHz (<sup>1</sup>H), 100.61 MHz (<sup>13</sup>C), and 79.46 MHz (<sup>29</sup>Si). Tetramethylsilane was used as an internal standard for <sup>1</sup>H, <sup>13</sup>C, and external standard for <sup>29</sup>Si NMR spectra. <sup>19</sup>F NMR spectra (operating frequencies: 276.47 MHz) were recorded on AV400 MHz, and instrument default calibration (CFCl<sub>3</sub>) was used. Thermogravimetric analysis (TGA) was performed in a Perkin-Elmer thermogravimetric analyzer (TGA 7) in nitrogen or in air at a heating rate of 20 °C/min. Differential scanning calorimetry (DSC) experiments were studied on a TA instrument DSC 2920 under a heating and cooling rate of 10 °C/min in nitrogen. Elemental analysis was conducted on a Perkin-Elmer 240C elemental analyzer for C, H, and S determination at the Chemical and Molecular Analysis Center, Department of Chemistry, National University of Singapore.

Spin coating for water contact angle was conducted on Rame-Hart Contact angle goniometer, with 5 wt.% of FluoroPOSS in PMMA solution (10 mg/mL in CHCl<sub>3</sub>).

Atomic Force Microscopy (AFM) experiments: FluoroPOSS was dissolved in mr-I PMMA (bought from Micro Resist Technology GmbH) at a concentration of 0.3 mg/mL and 1 mg/mL. The rotation speed during spin coating was set 2000 rpm and last for 30s. Nanotribology experiments were performed by a Nanoscope III scanning probe microscopy (Veeco-Digital Instruments (DI), Santa Barbara). Commercially available V shaped Si<sub>3</sub>N<sub>4</sub> cantilevers (DI) were used. Each cantilever was calibrated after a given experiment by measuring the thermal excitation of the tip to compute its spring constant. Tapping mode AFM scans was performed in air using a non-coated silicon tip with a spring constant of 10 N/m~20N/m (Nanosensors, Wetzlar, Germany). Features on the nanometer scale were imaged on a minimum of three different areas on the sample.

## 2. NMR spectra

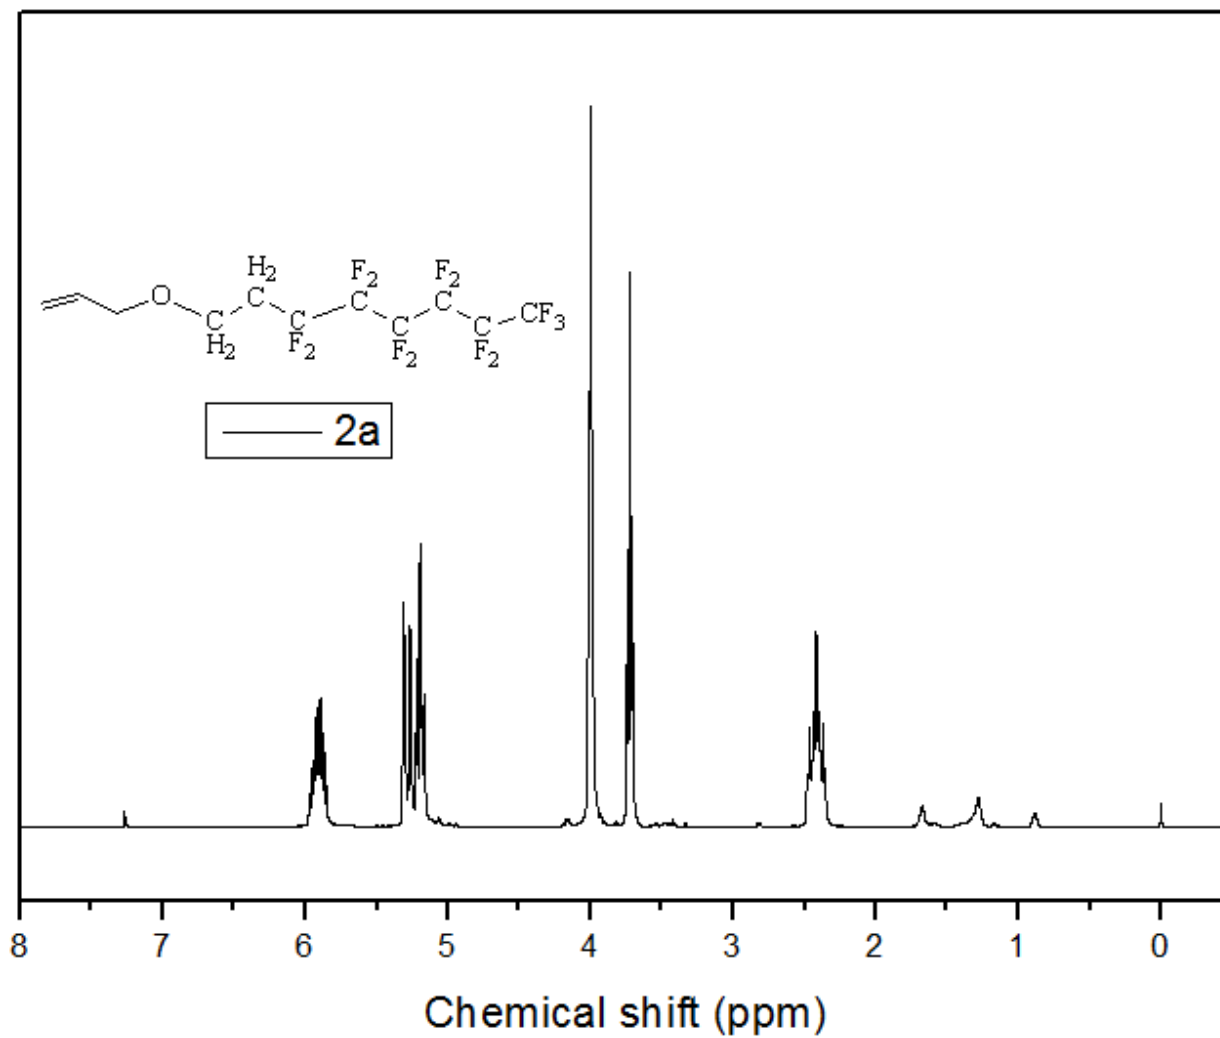

Figure S1:  $^1\text{H}$  NMR of compound **2a** in  $\text{CDCl}_3$  at room temperature.

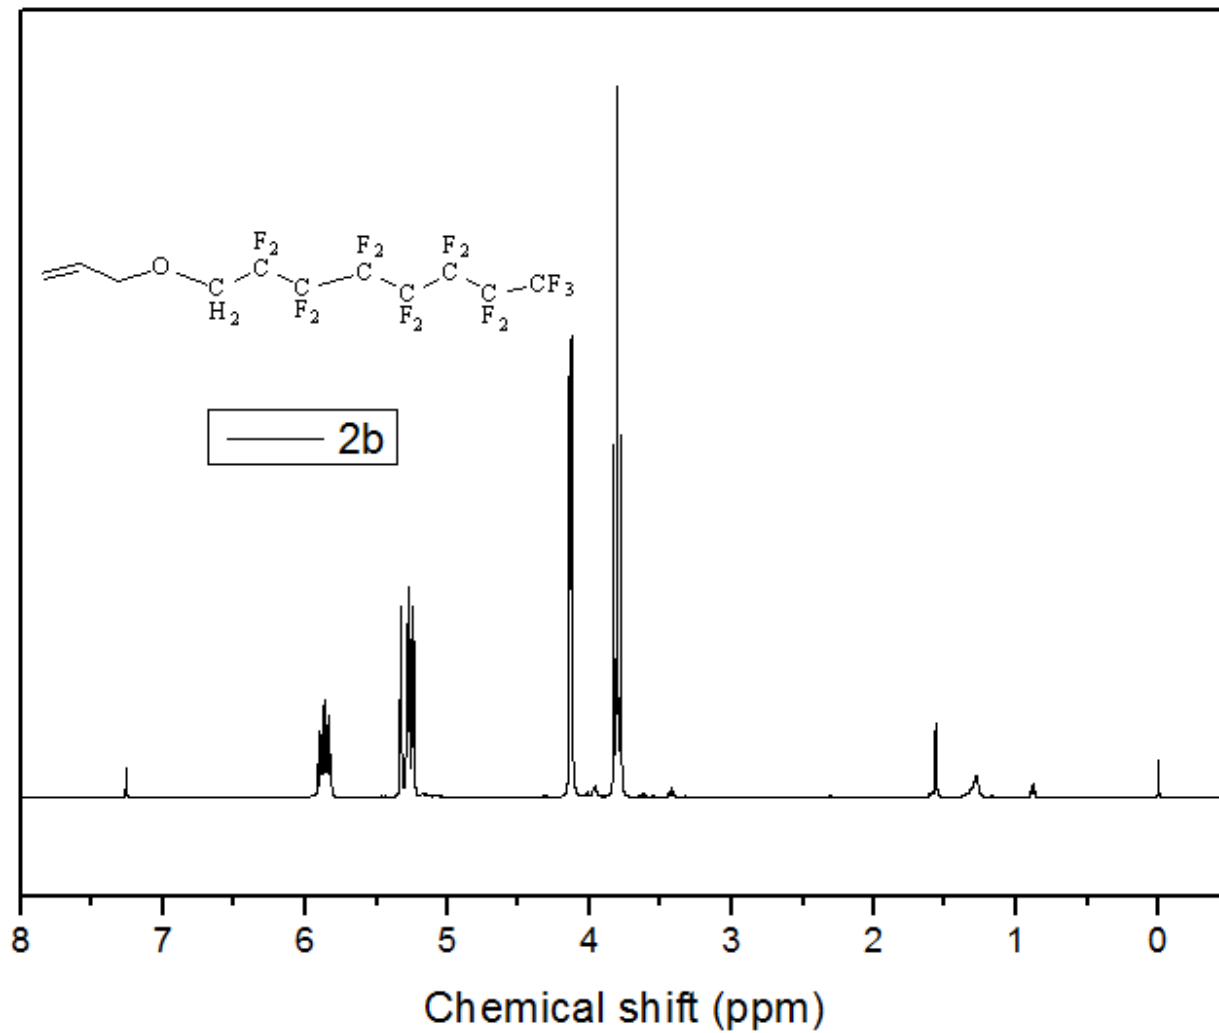

Figure S2: <sup>1</sup>H NMR of compound **2b** in CDCl<sub>3</sub> at room temperature.

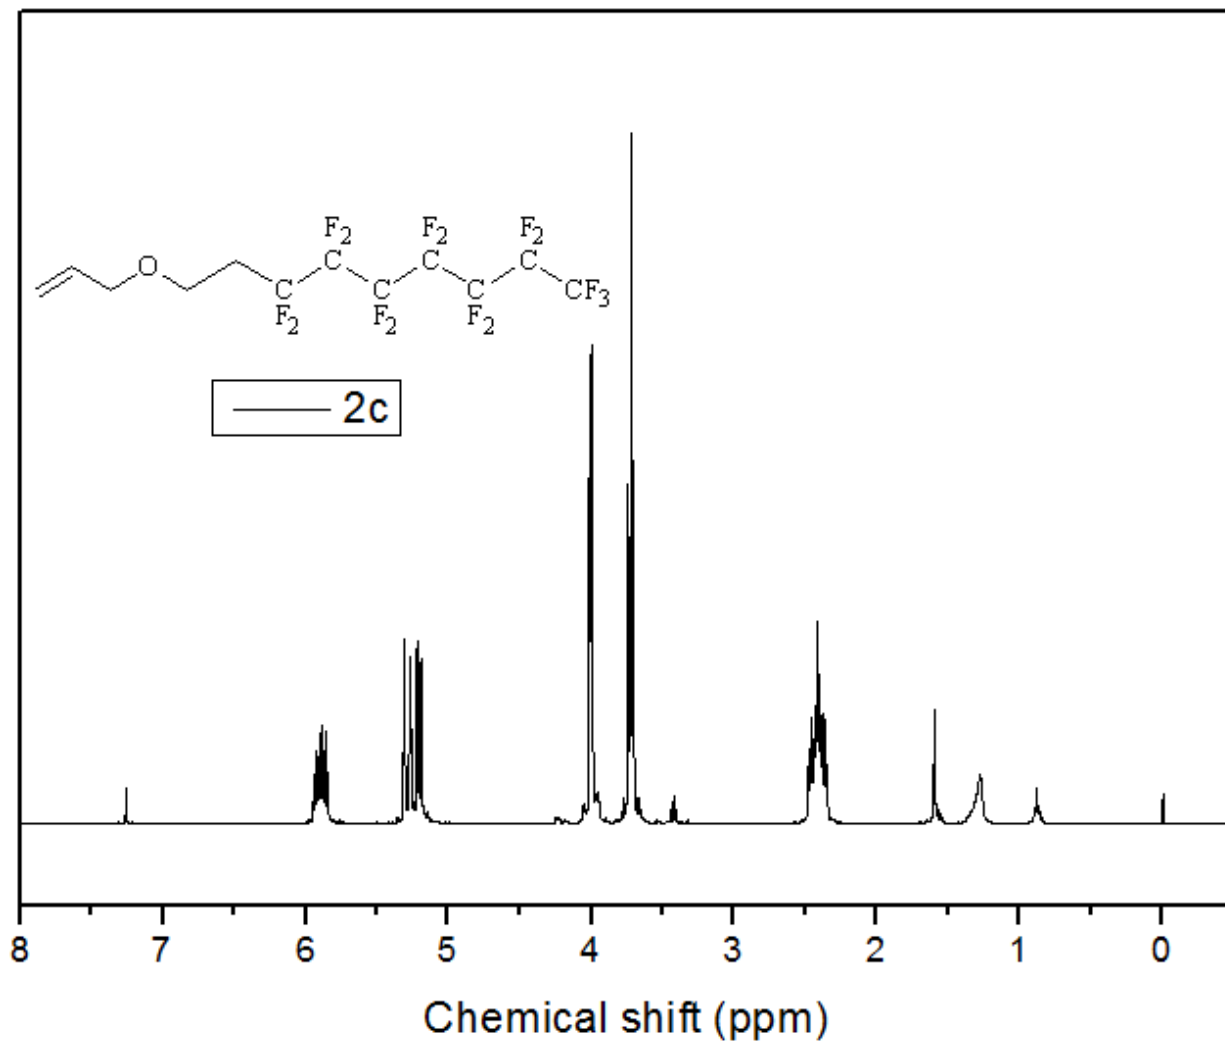

Figure S3:  $^1\text{H}$  NMR of compound **2c** in  $\text{CDCl}_3$  at room temperature.

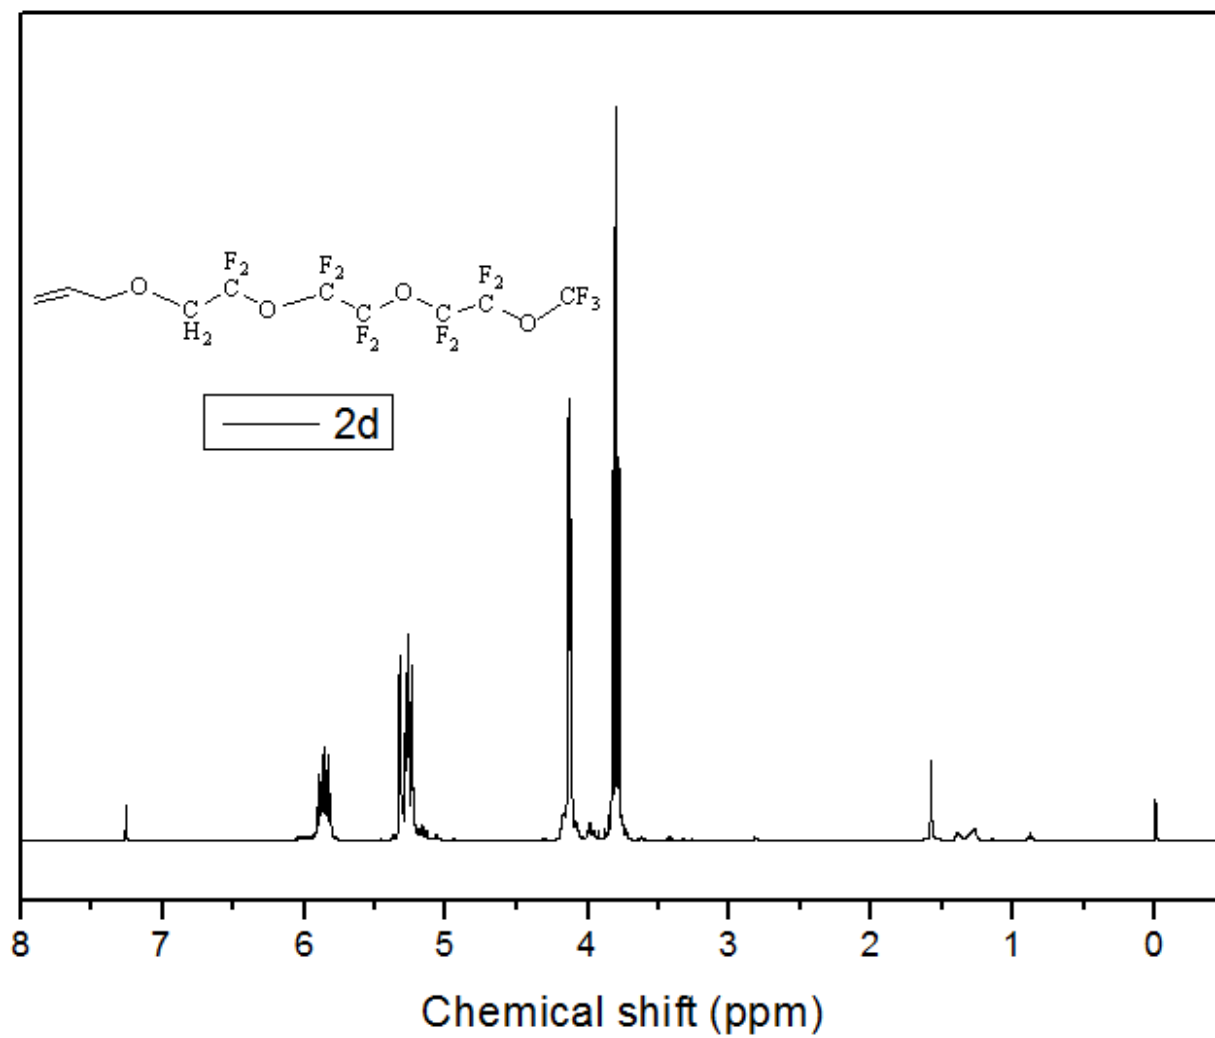

Figure S4:  $^1\text{H}$  NMR of compound **2d** in  $\text{CDCl}_3$  at room temperature.

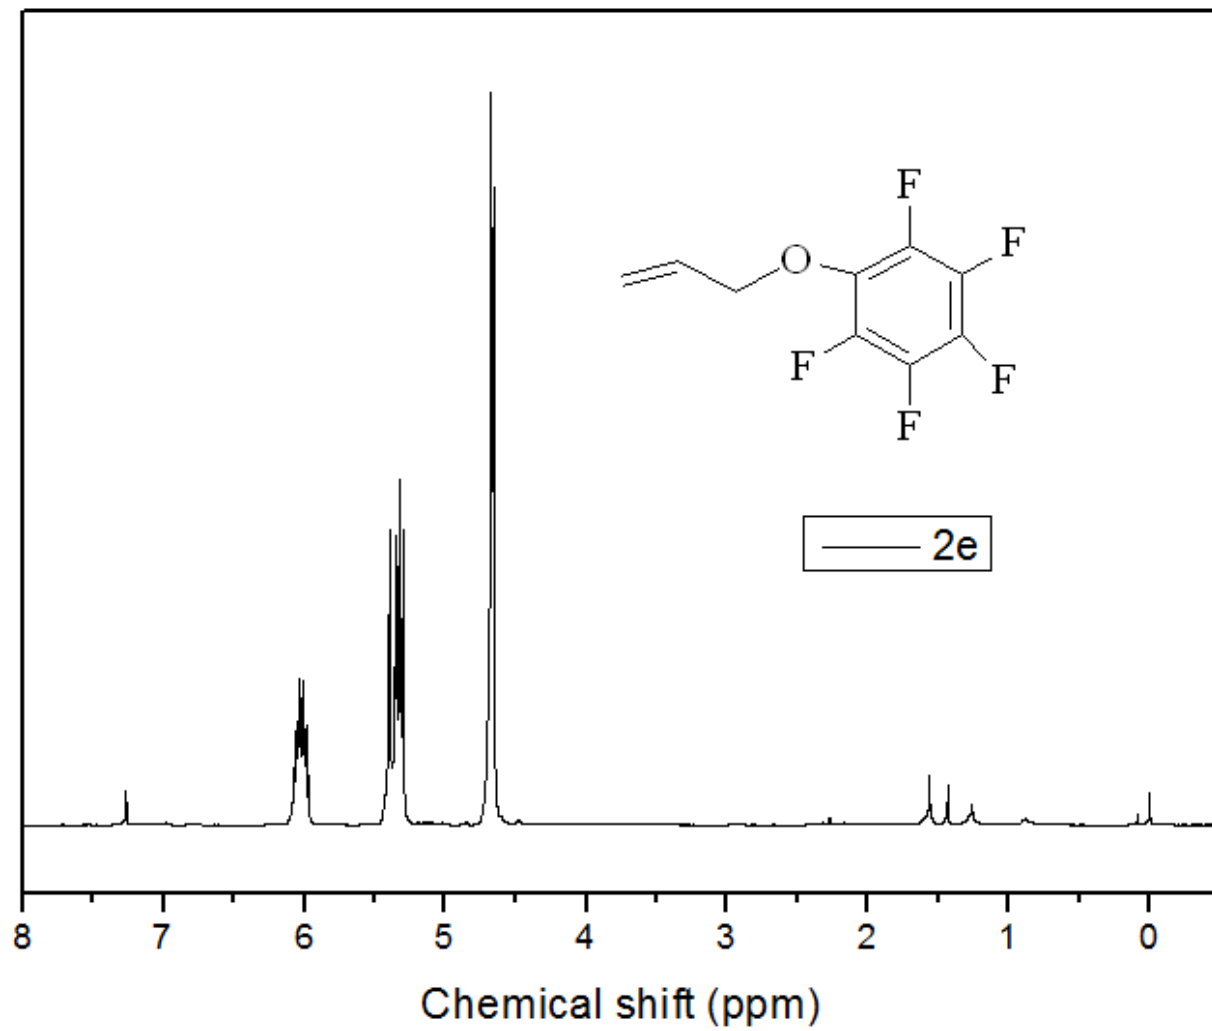

Figure S5:  $^1\text{H}$  NMR of compound **2e** in  $\text{CDCl}_3$  at room temperature.

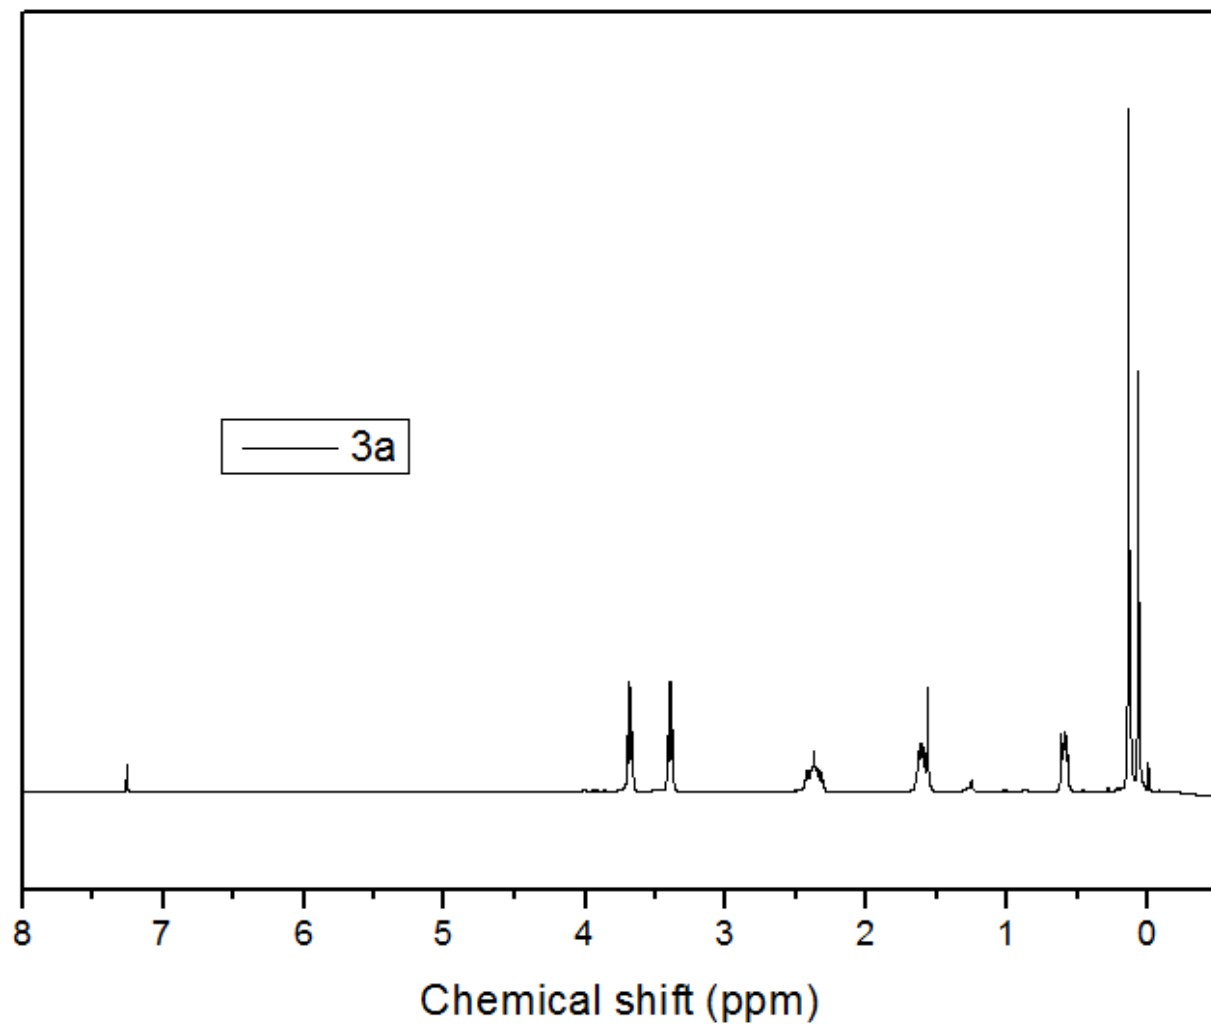

Figure S6:  $^1\text{H}$  NMR of compound **3a** in  $\text{CDCl}_3$  at room temperature.

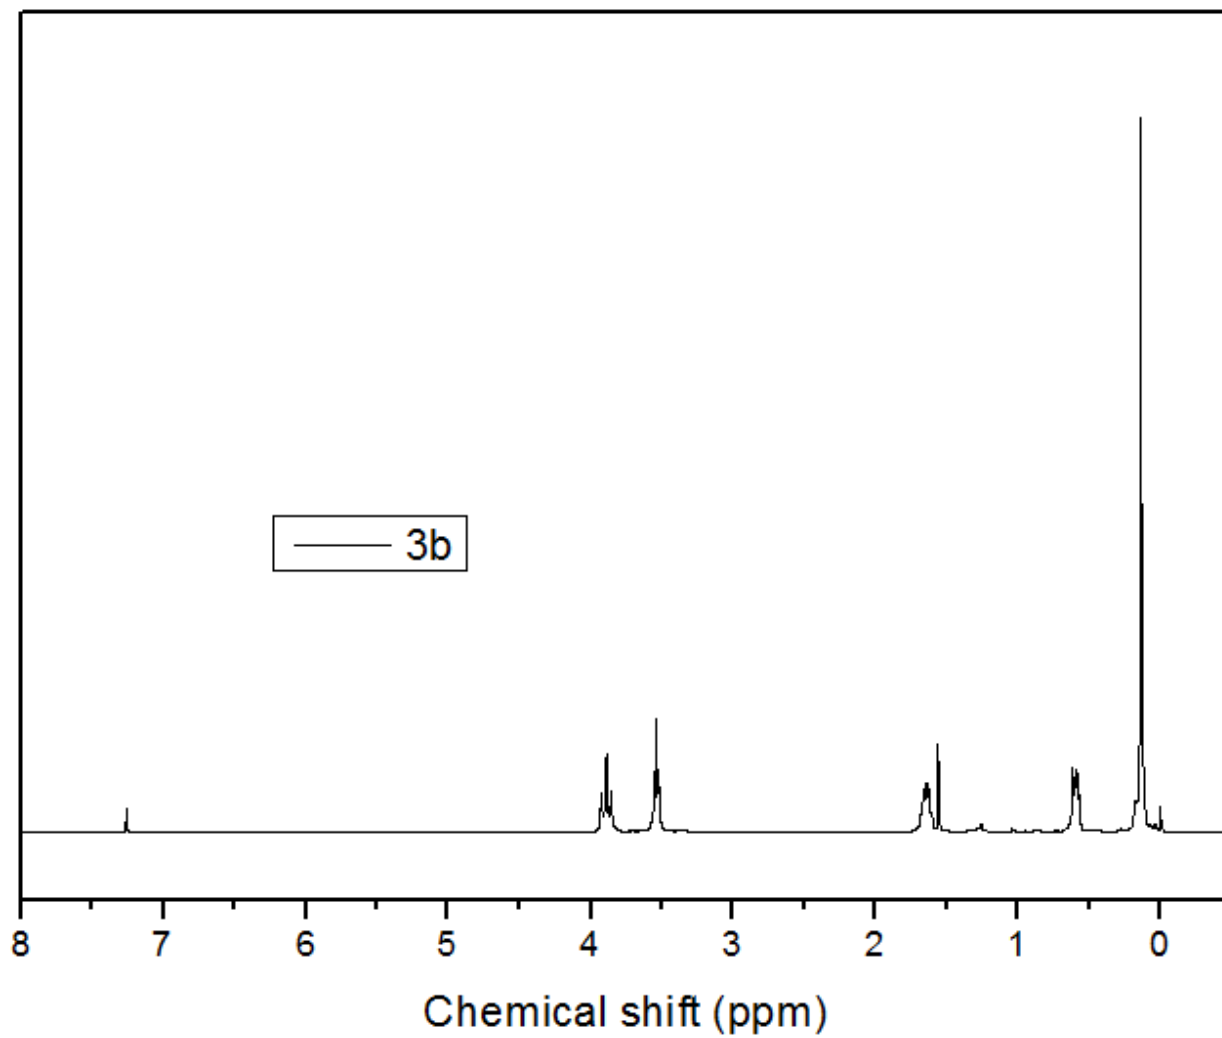

Figure S7:  $^1\text{H}$  NMR of compound **3b** in  $\text{CDCl}_3$  at room temperature.



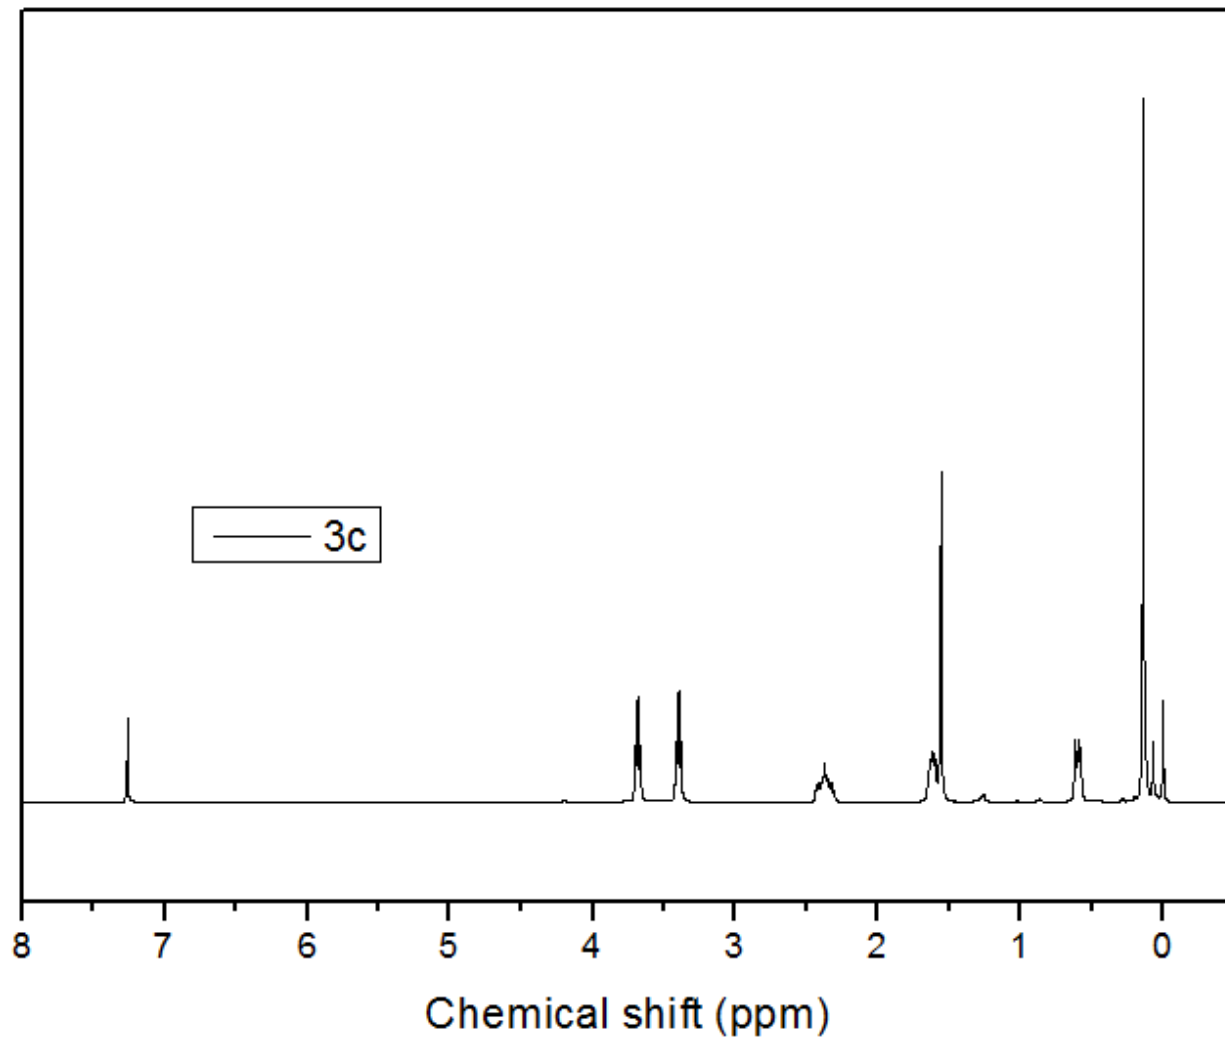

Figure S8:  $^1\text{H}$  NMR of compound **3c** in  $\text{CDCl}_3$  at room temperature.

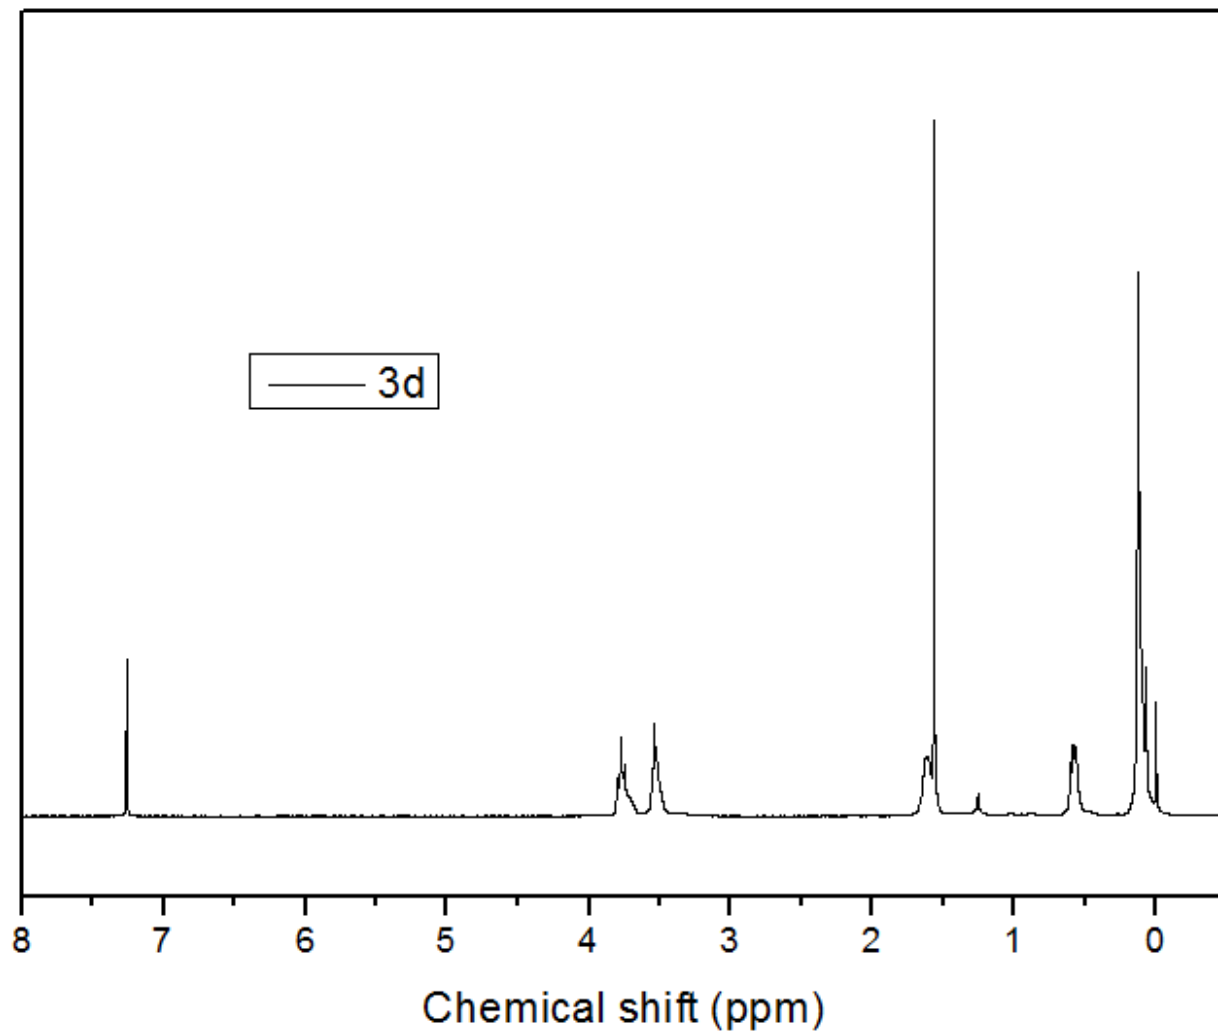

Figure S9:  $^1\text{H}$  NMR of compound **3d** in  $\text{CDCl}_3$  at room temperature.

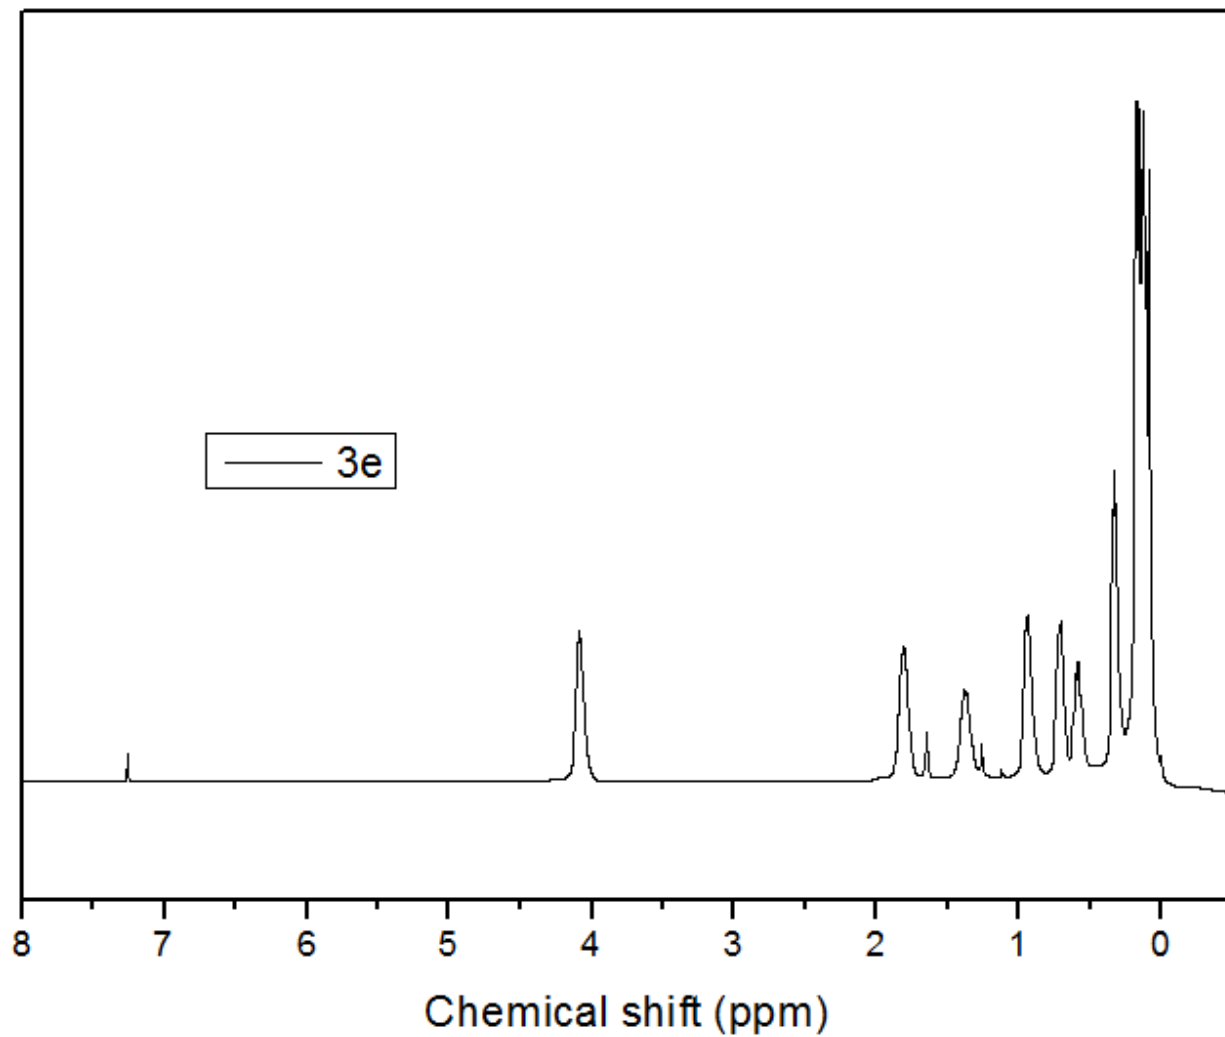

Figure S10:  $^1\text{H}$  NMR of compound **3e** in  $\text{CDCl}_3$  at room temperature.

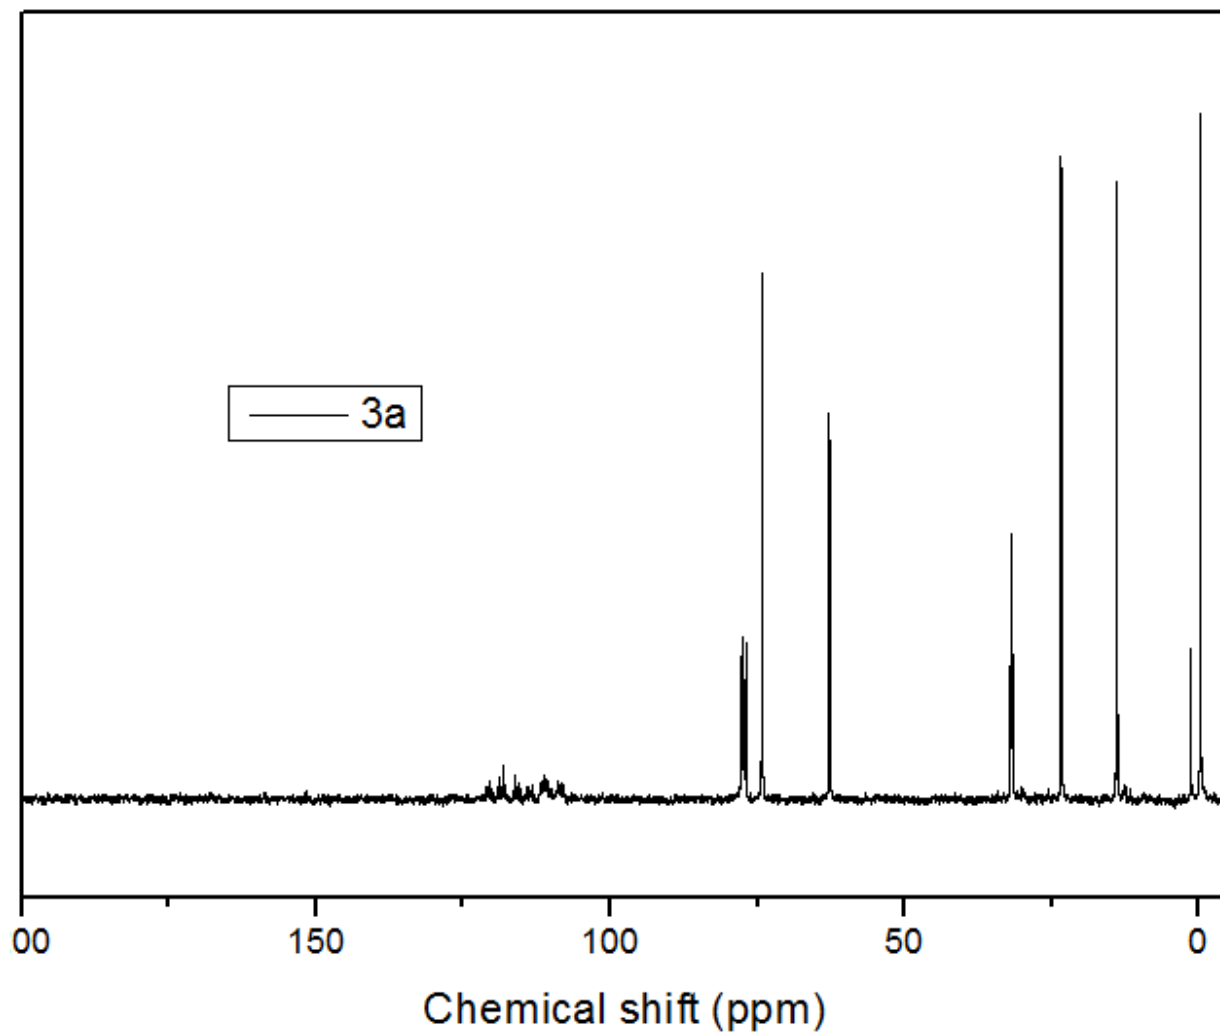

Figure S11:  $^{13}\text{C}$  NMR of compound **3a** in  $\text{CDCl}_3$  at room temperature.

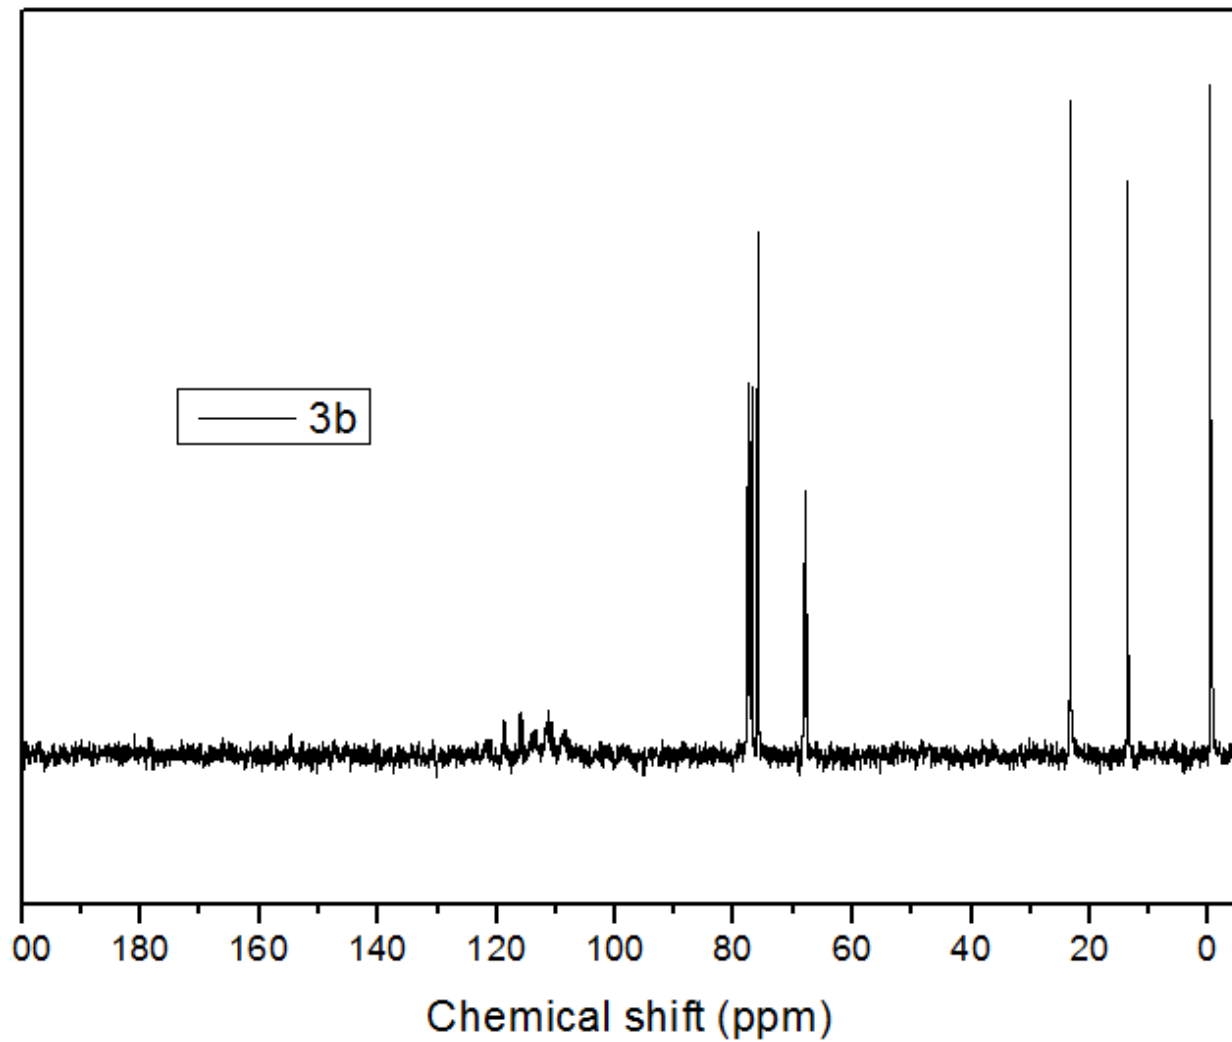

Figure S12:  $^{13}\text{C}$  NMR of compound **3b** in  $\text{CDCl}_3$  at room temperature.

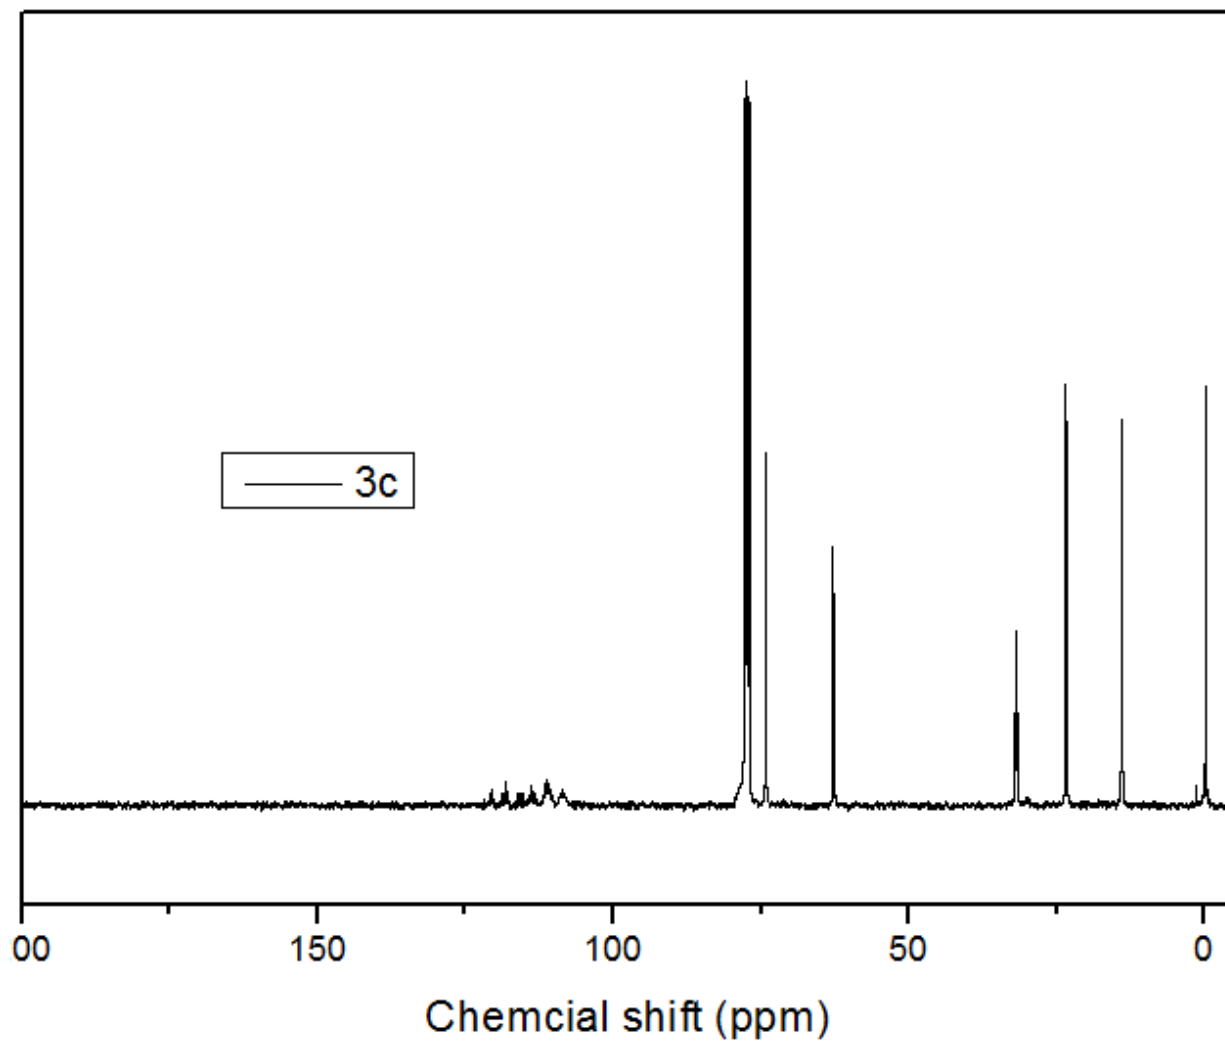

Figure S13:  $^{13}\text{C}$  NMR of compound **3c** in  $\text{CDCl}_3$  at room temperature.

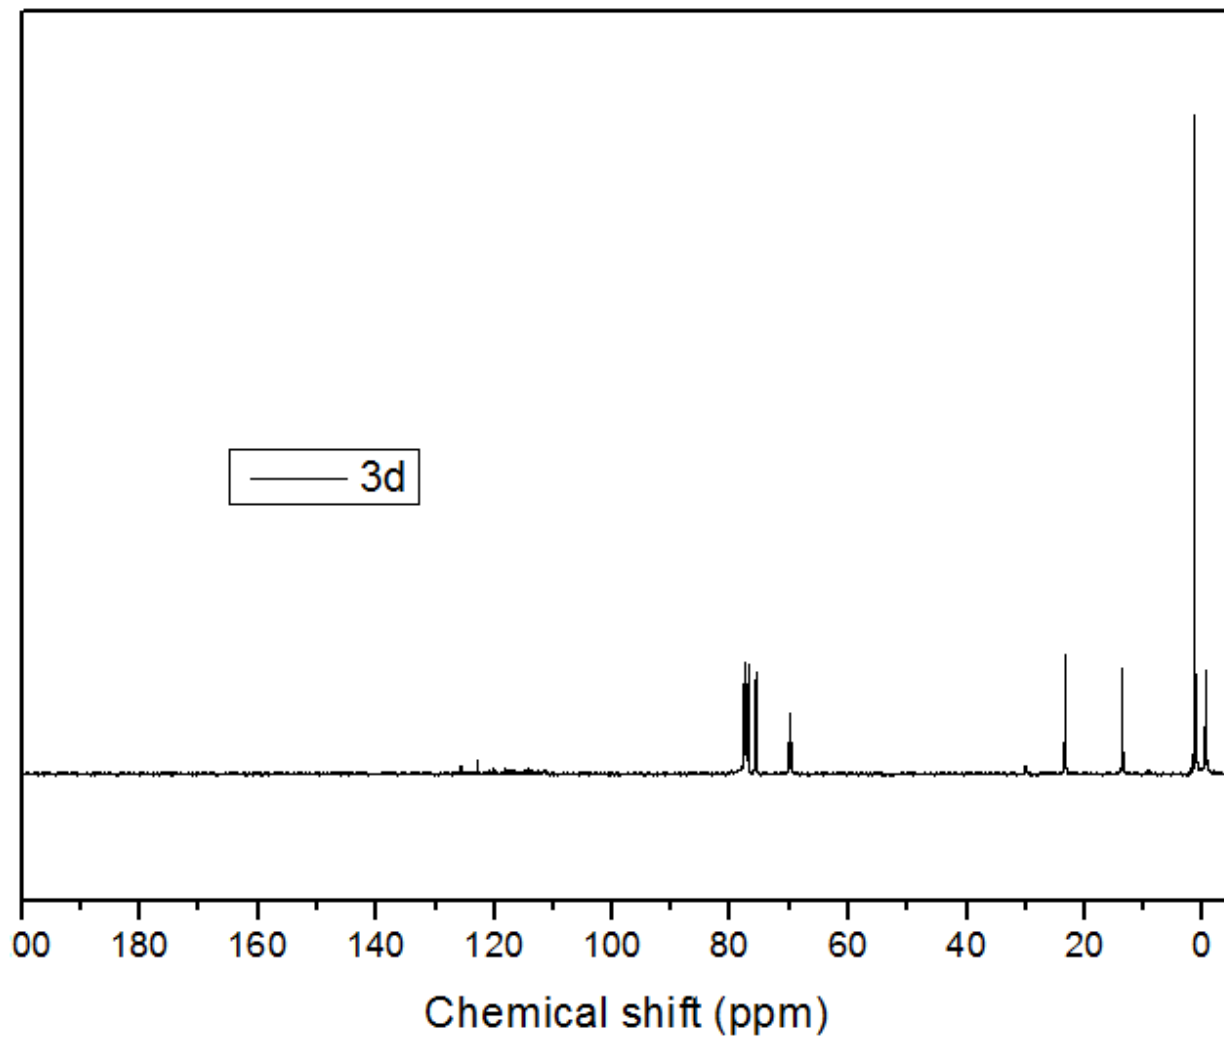

Figure S14:  $^{13}\text{C}$  NMR of compound **3d** in  $\text{CDCl}_3$  at room temperature.

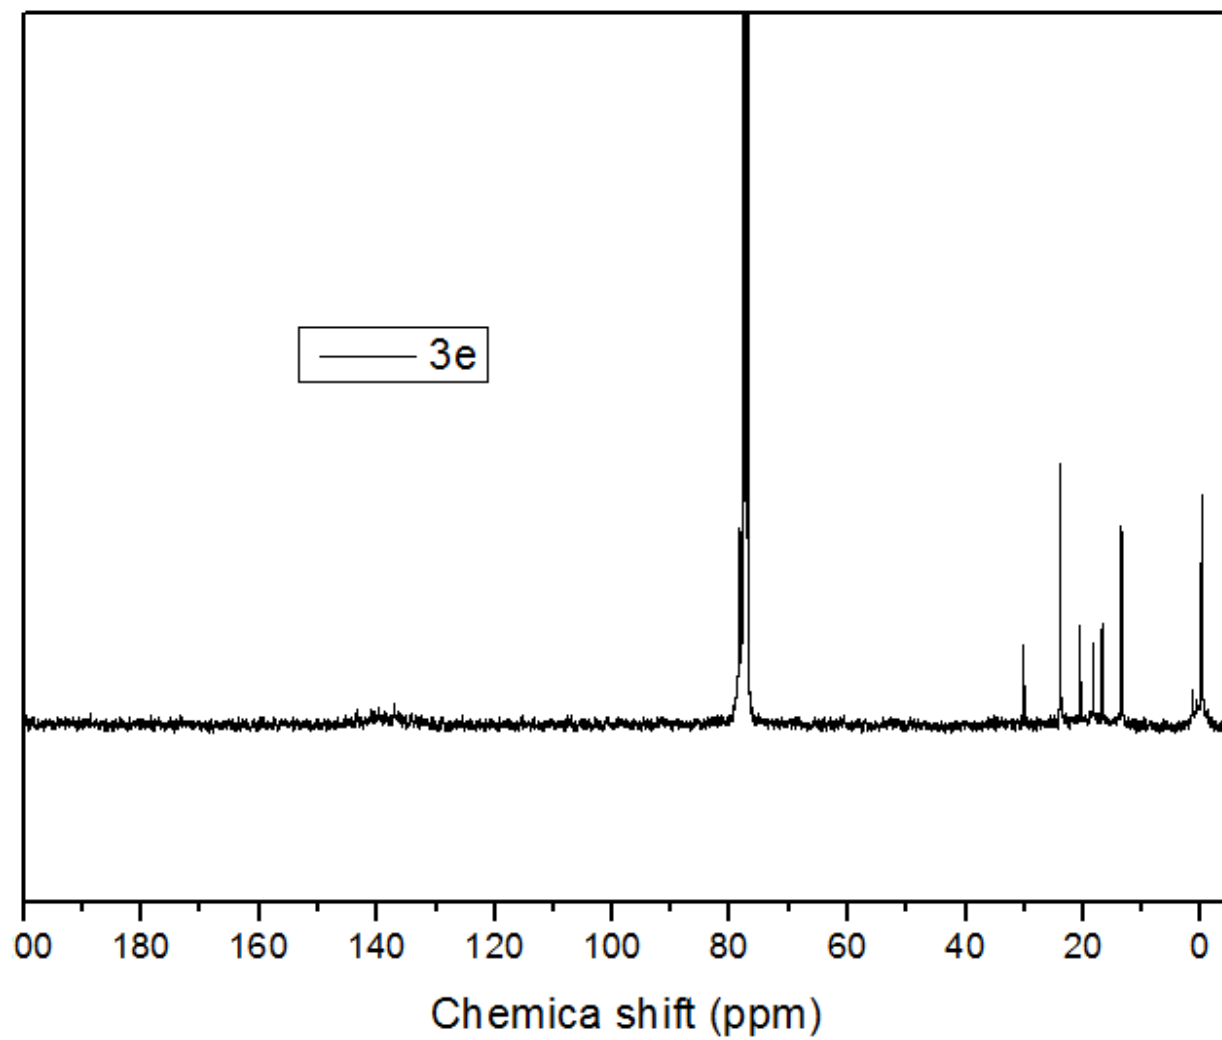

Figure S15:  $^{13}\text{C}$  NMR of compound **3e** in  $\text{CDCl}_3$  at room temperature.



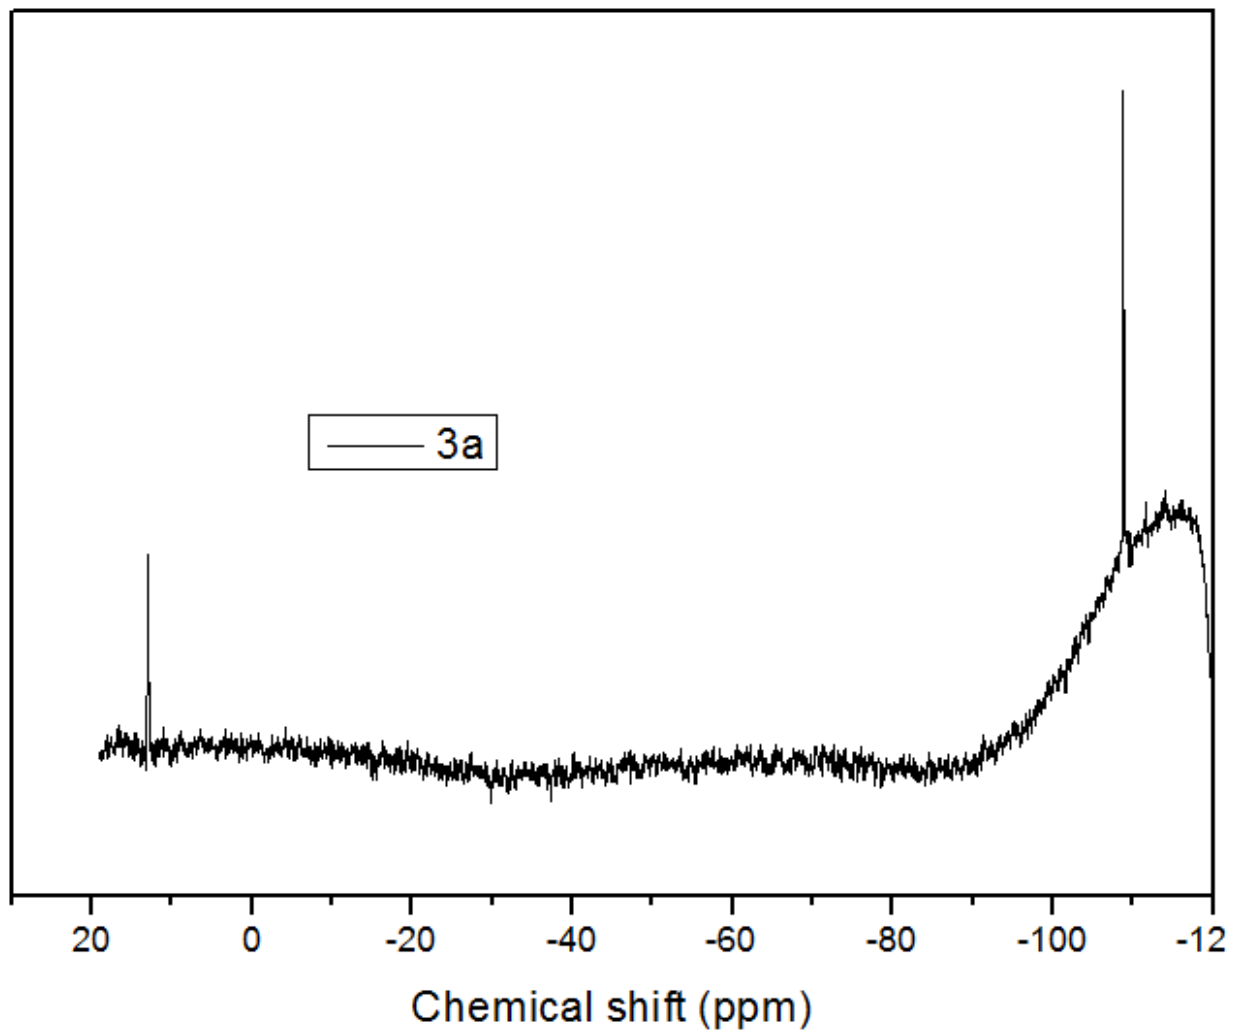

Figure S16:  $^{29}\text{Si}$  NMR of compound **3a** in  $\text{CDCl}_3$  at room temperature.

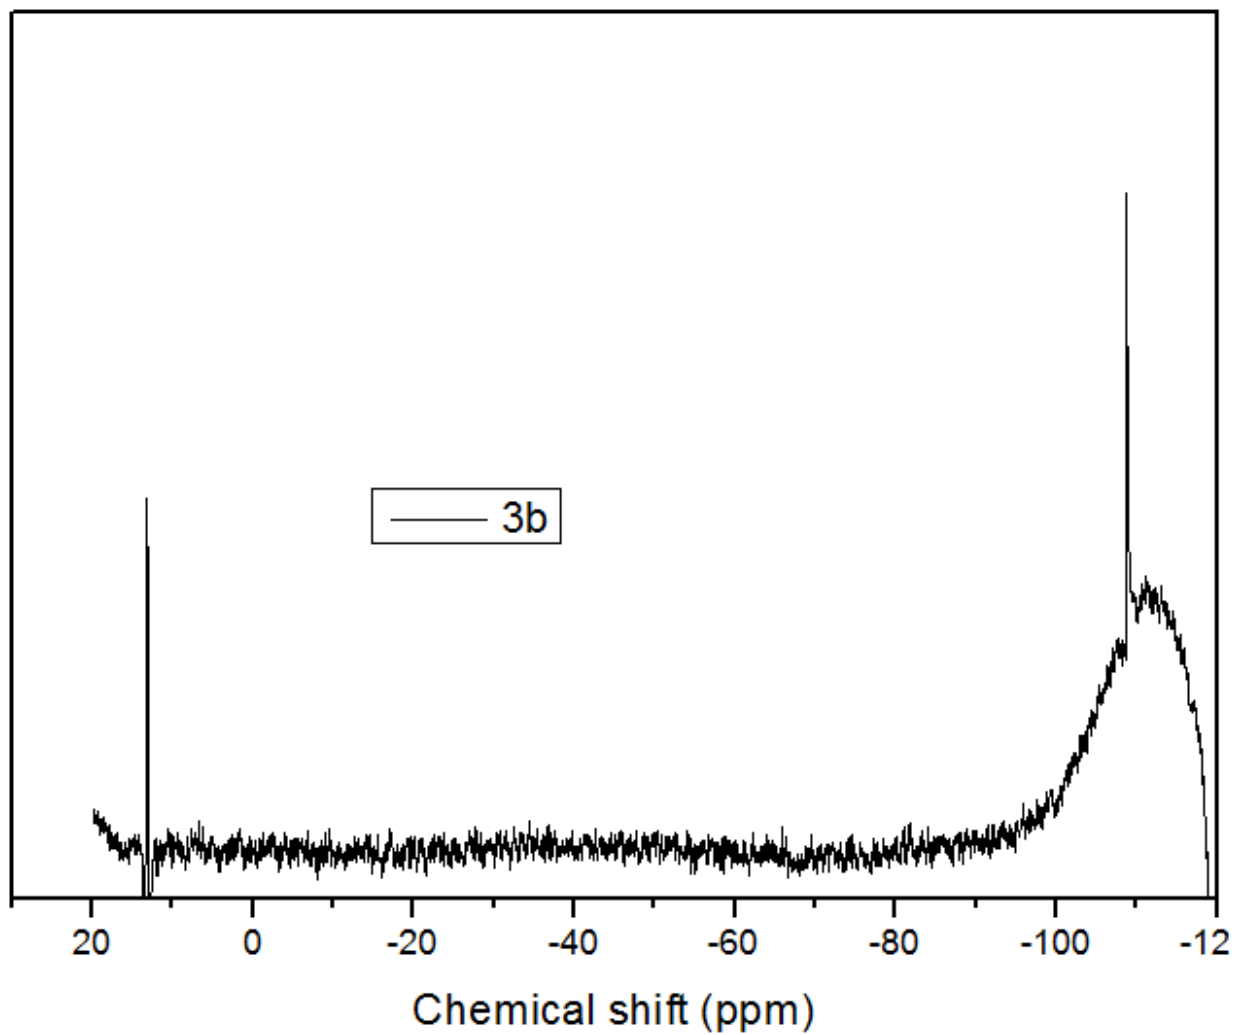

Figure S17:  $^{29}\text{Si}$  NMR of compound **3b** in  $\text{CDCl}_3$  at room temperature.

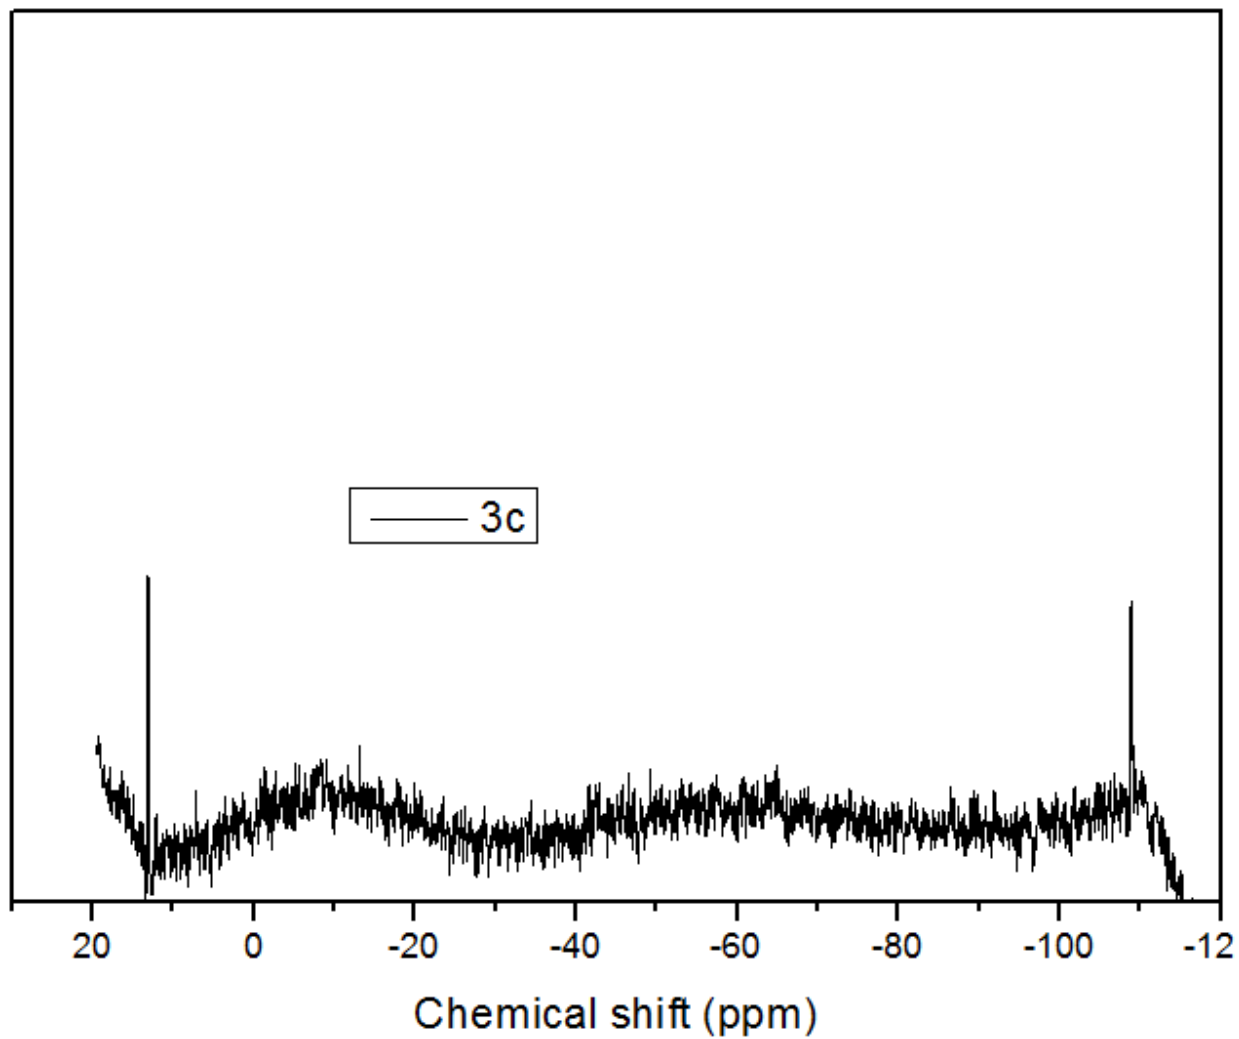

Figure S18:  $^{29}\text{Si}$  NMR of compound **3c** in  $\text{CDCl}_3$  at room temperature.

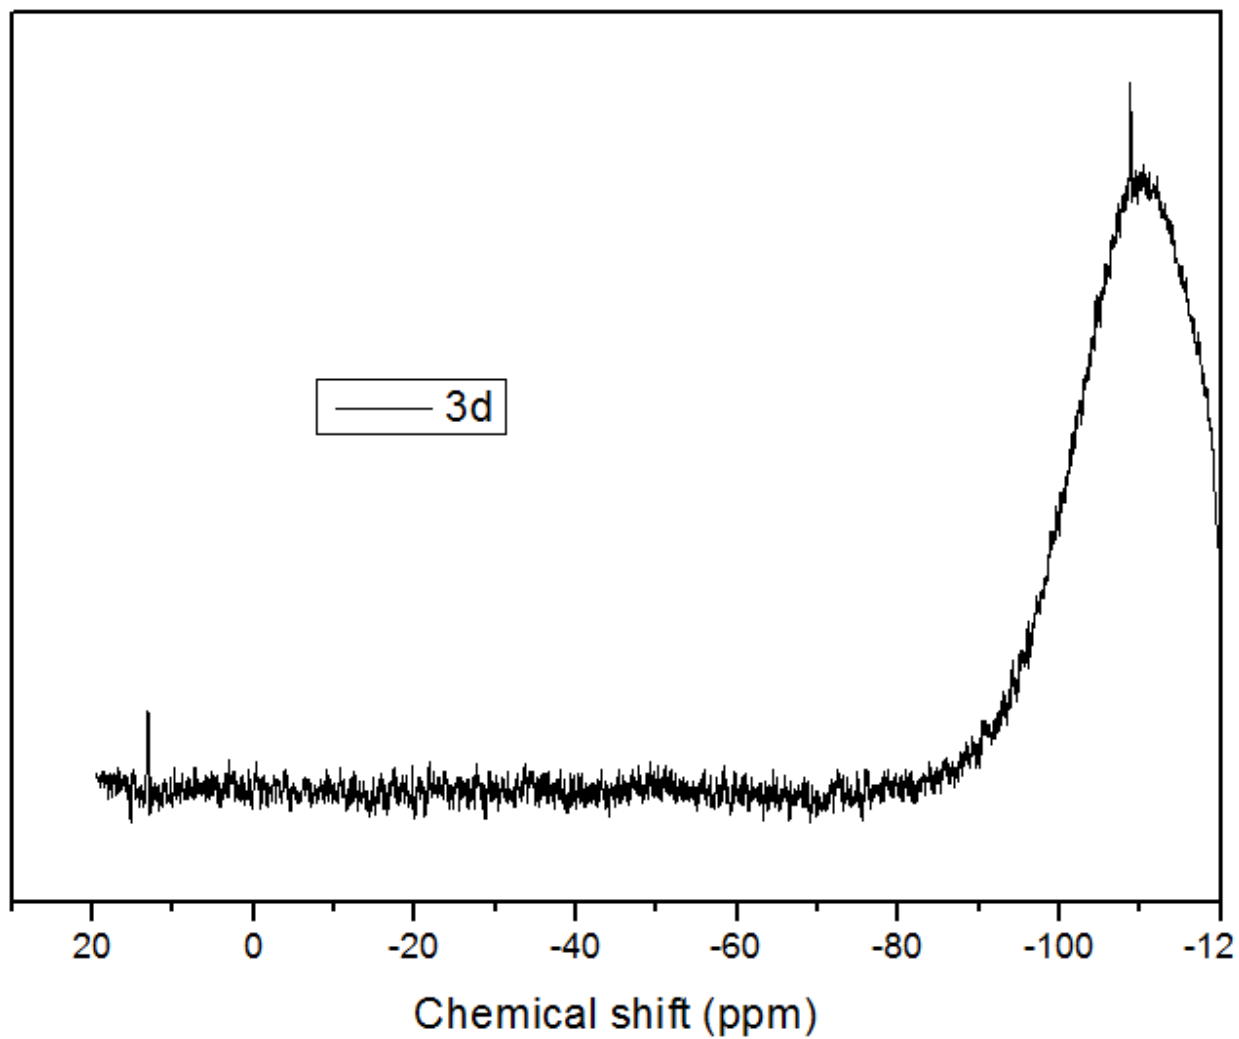

Figure S19:  $^{29}\text{Si}$  NMR of compound **3d** in  $\text{CDCl}_3$  at room temperature.

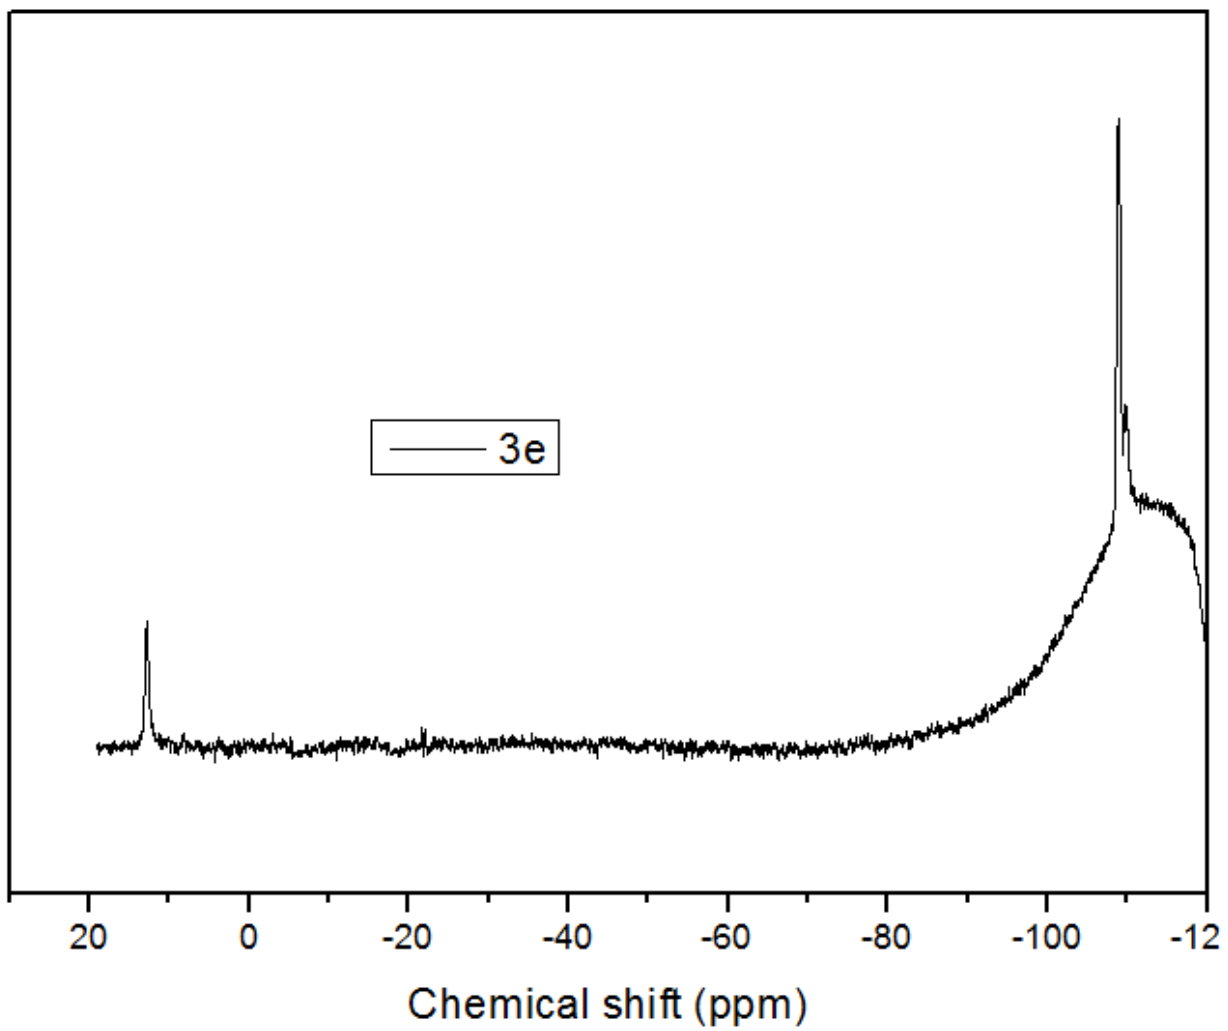

Figure S20:  $^{29}\text{Si}$  NMR of compound **3e** in  $\text{CDCl}_3$  at room temperature.

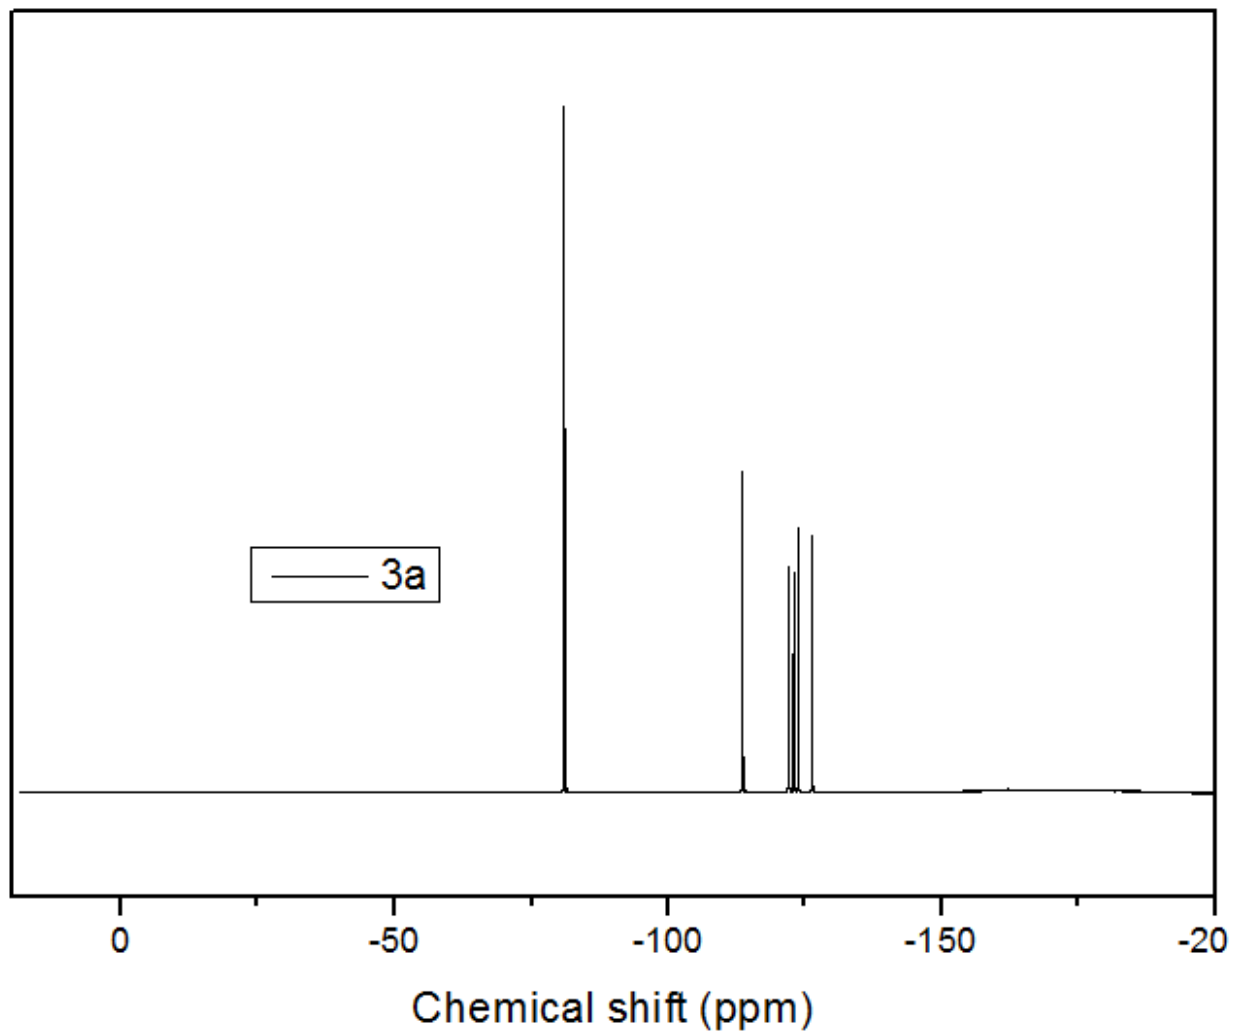

Figure S21:  $^{19}\text{F}$  NMR of compound **3a** in  $\text{CDCl}_3$  at room temperature.

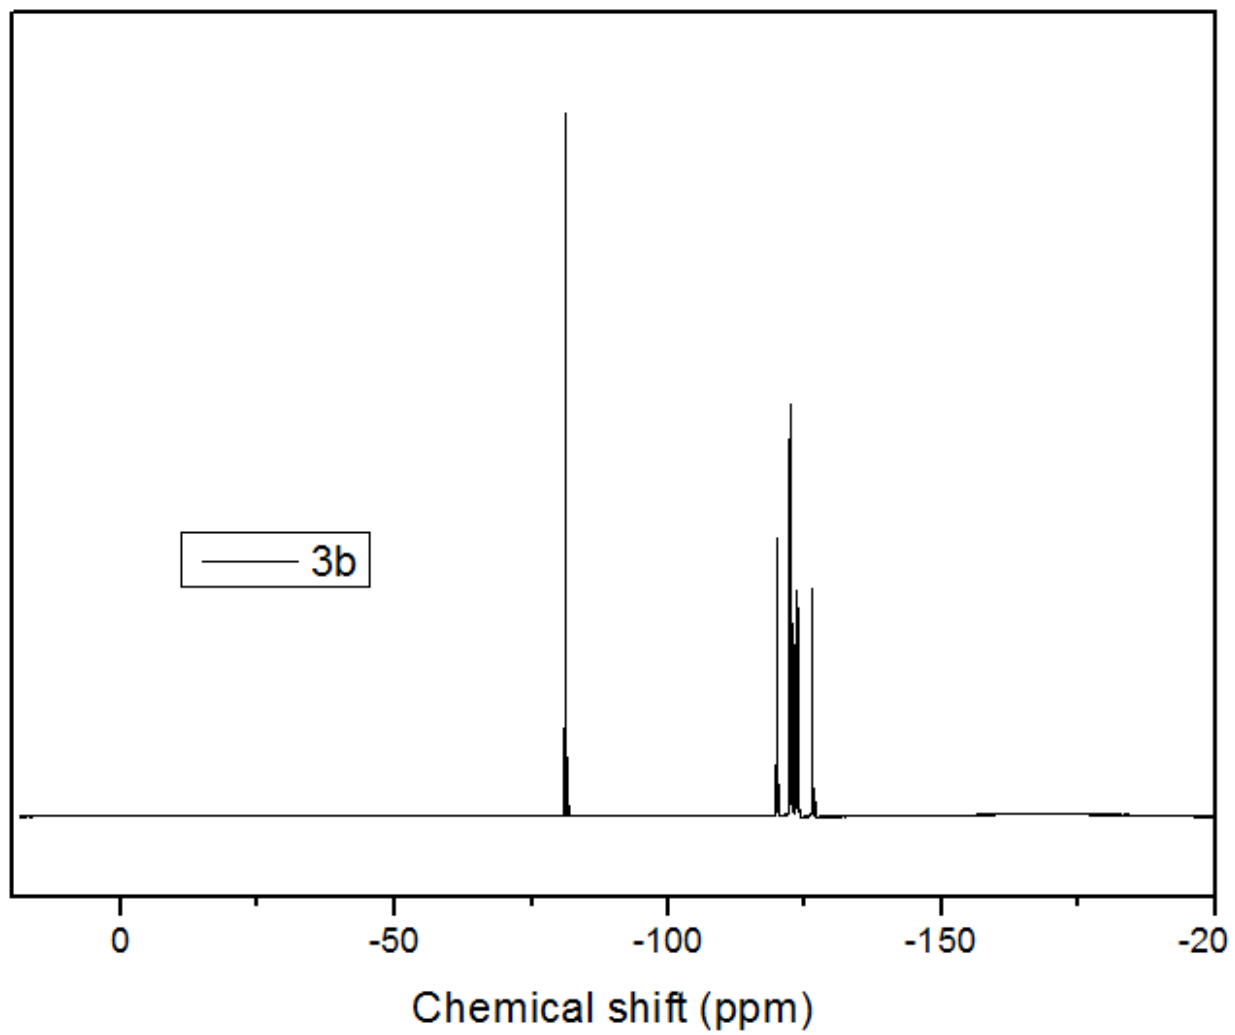

Figure S22:  $^{19}\text{F}$  NMR of compound **3b** in  $\text{CDCl}_3$  at room temperature.

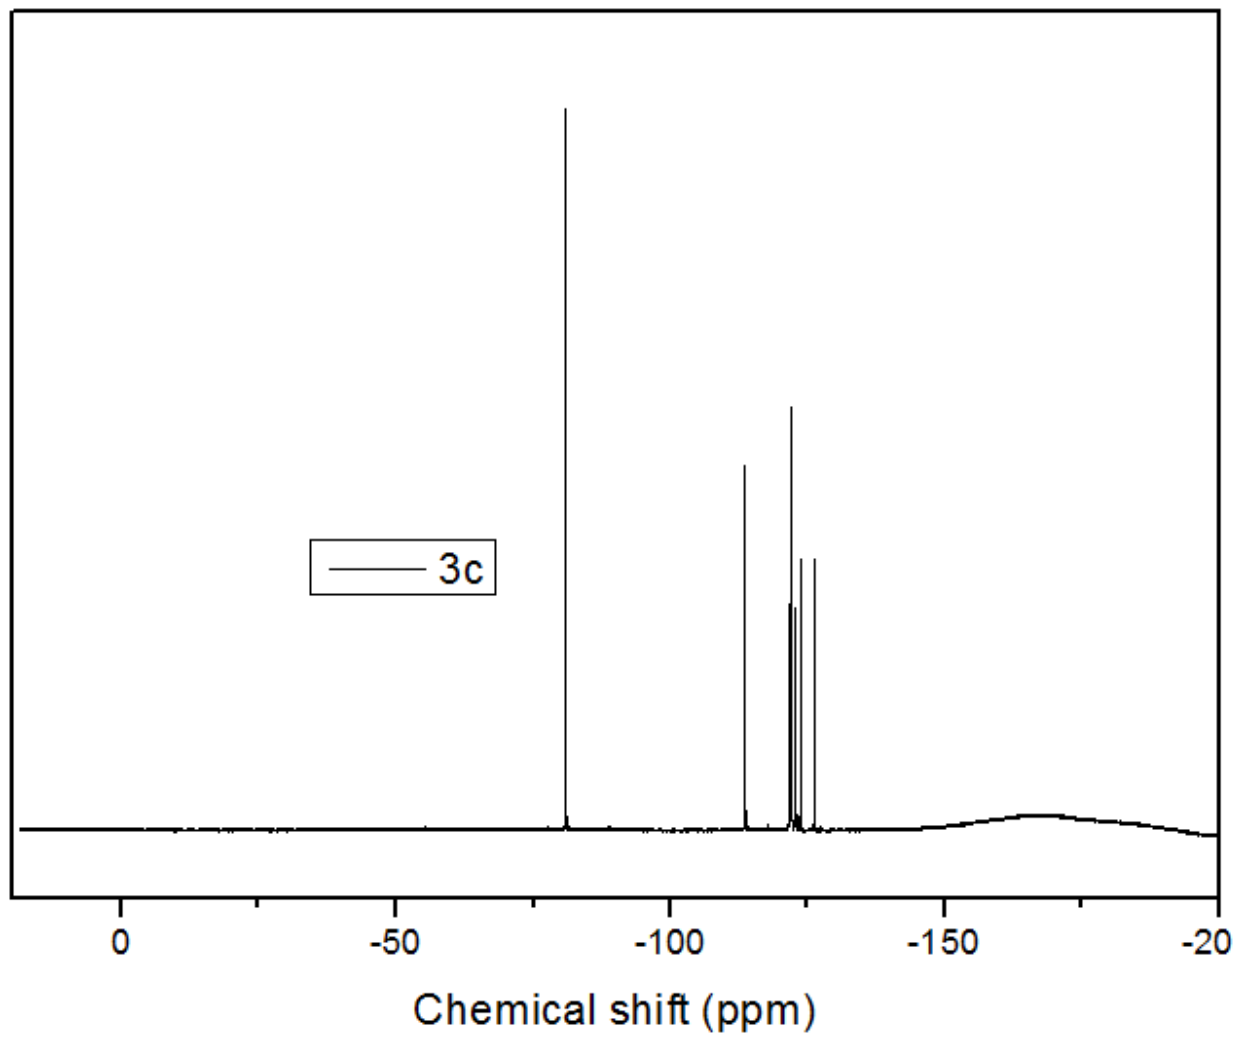

Figure S23:  $^{19}\text{F}$  NMR of compound **3c** in  $\text{CDCl}_3$  at room temperature.



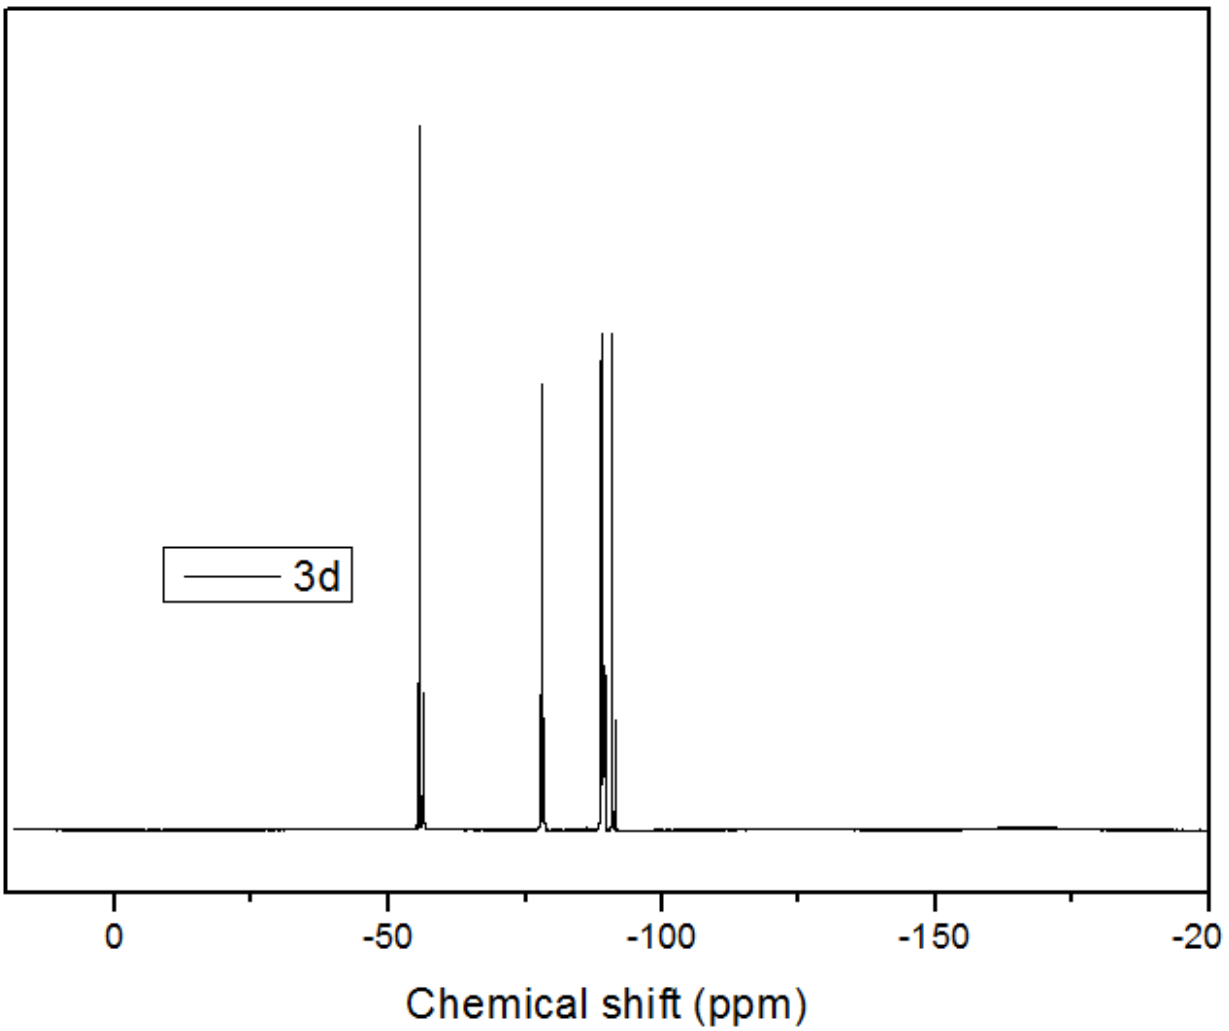

Figure S24:  $^{19}\text{F}$  NMR of compound **3d** in  $\text{CDCl}_3$  at room temperature.

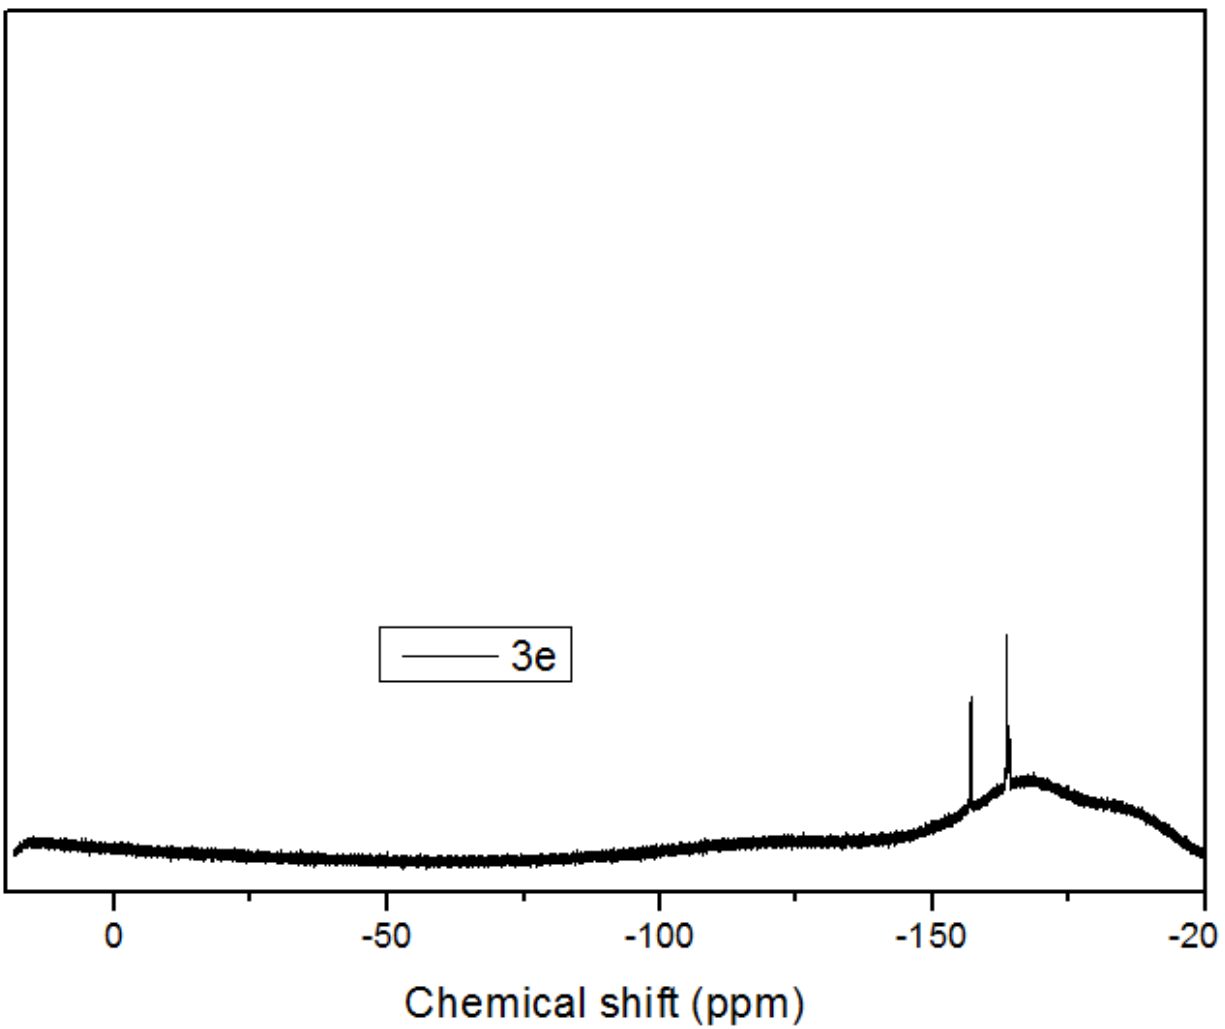

Figure S25:  $^{19}\text{F}$  NMR of compound **3e** in  $\text{CDCl}_3$  at room temperature.
